# Supplementary material for: A biochemical necroptosis model explains cell-type-specific responses to cell death cues
Source: PubMed Central journal article supplement — Biophys J. 2023 Jan 28;122(5):817–34. doi: 10.1016/j.bpj.2023.01.035 (PMC10027451; doi:10.1016/j.bpj.2023.01.035), 2023-01-28
Supplement: mmc1.pdf [file mmc1.pdf]

**Biophysical Journal, Volume 122**

**Supplemental information**

**A biochemical necroptosis model explains cell-type-specific responses to cell death cues**

**Geena V. Ildefonso, Marie Oliver Metzig, Alexander Hoffmann, Leonard A. Harris, and Carlos F. Lopez**

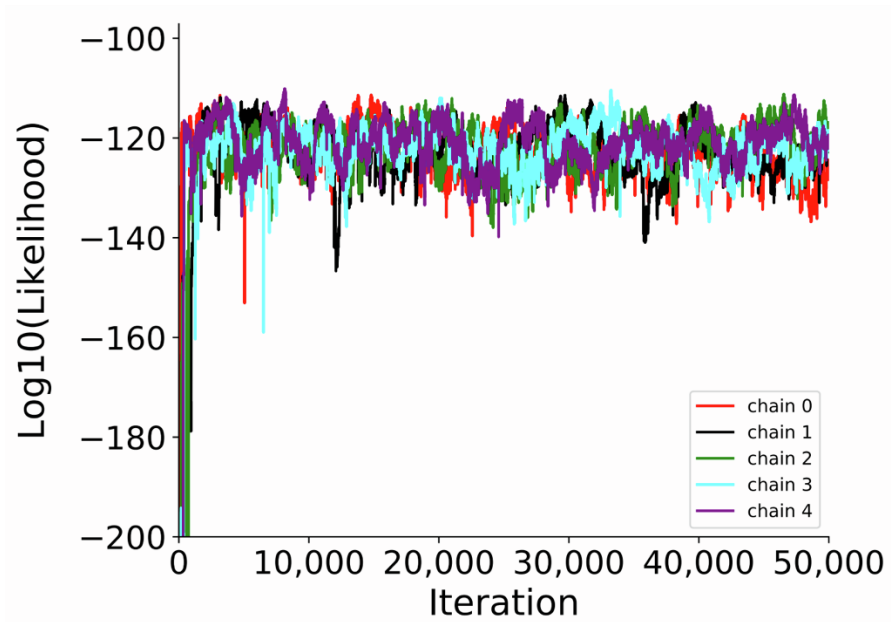

**Figure S1. Log-likelihood vs. iteration for all five Markov chains used in the Bayesian parameter calibration.** For each chain, the first 25,000 iterations were discarded (considered burn-in), leaving a total of 125,000 parameter sets, of which 10,628 are unique.

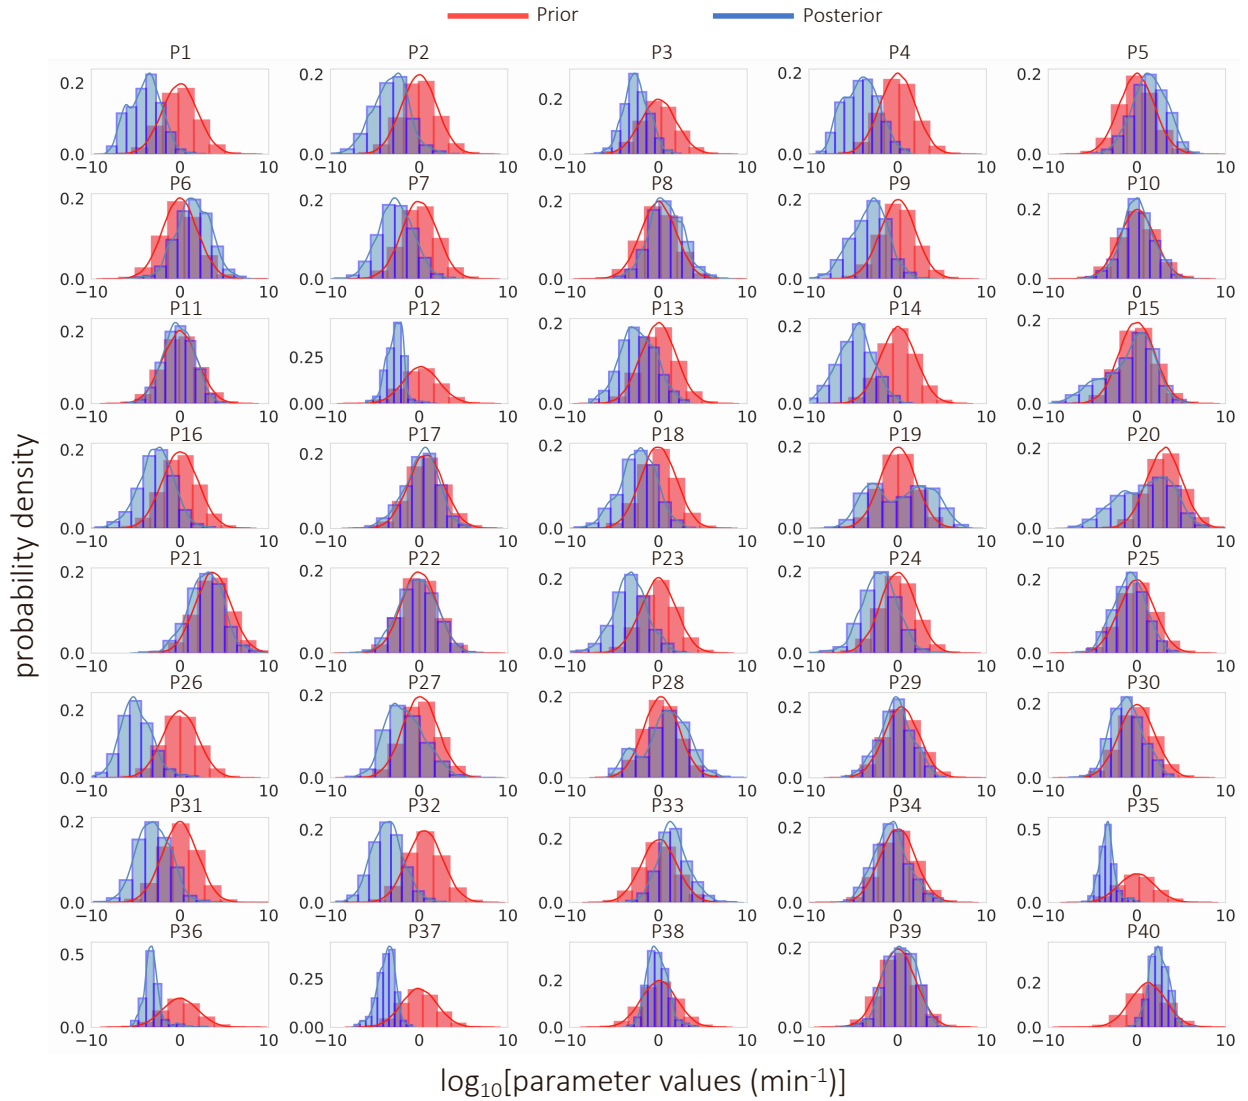

**Figure S2. Distributions of parameter values from Bayesian model calibration.** Both prior (red) and posterior (blue) distributions are shown.

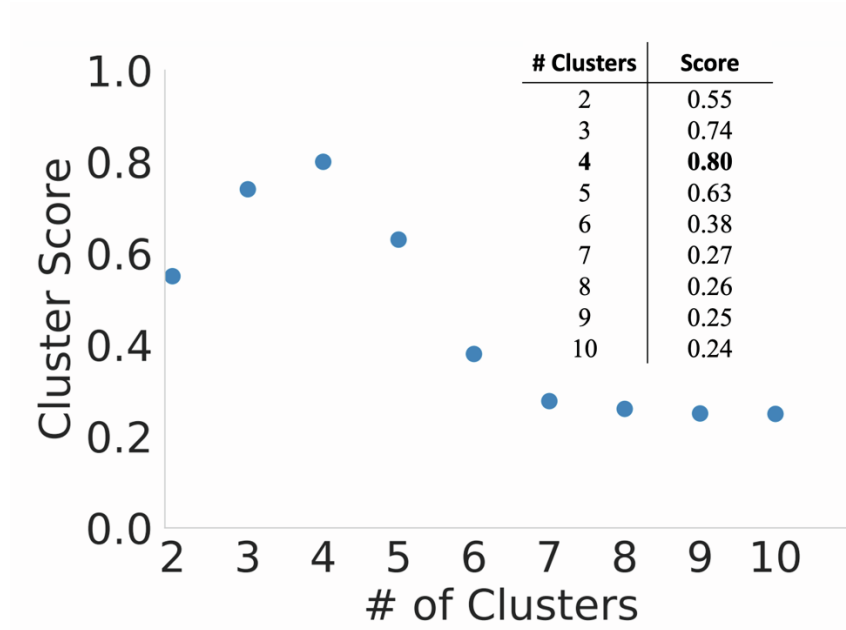

**Figure S3. Silhouette clustering scores for determining the number of modes of necroptosis execution.** The maximum value is for four clusters. Values were also calculated for 11-20 clusters and were all <0.3 (data not shown).

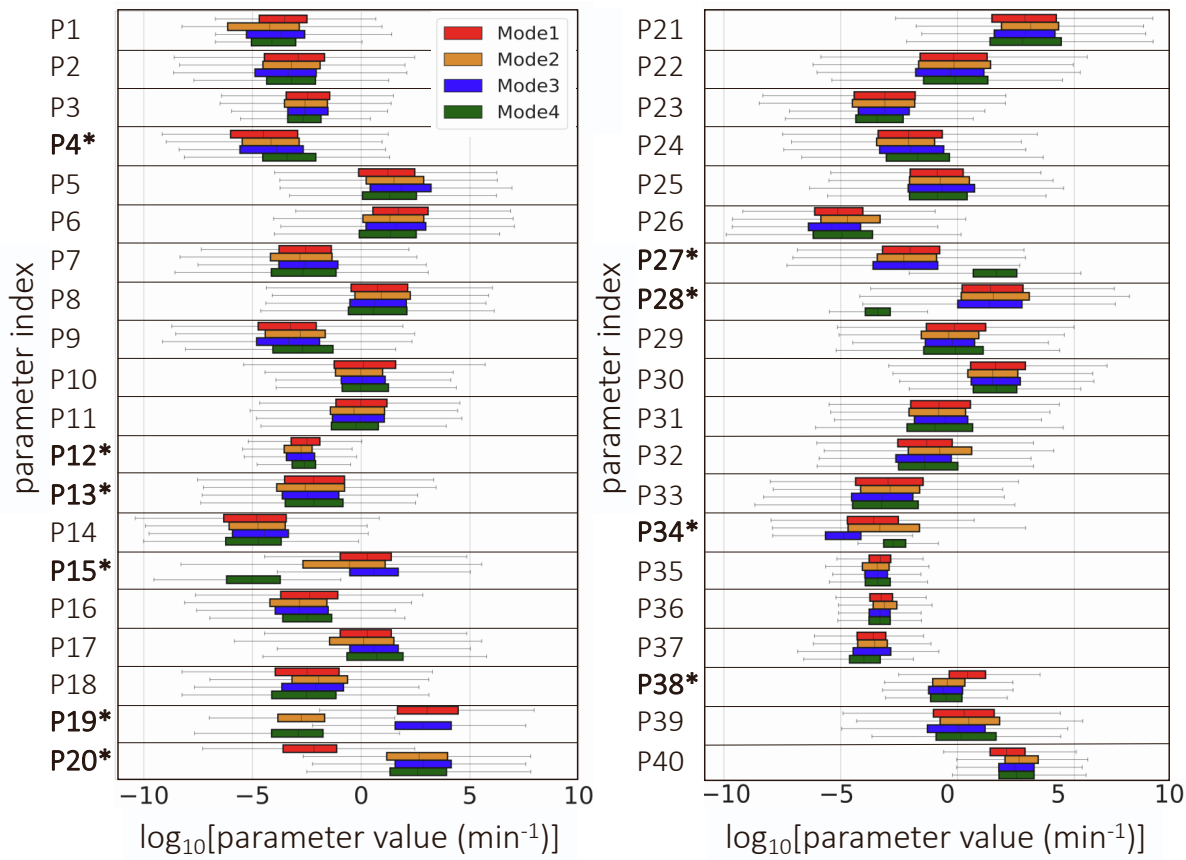

**Figure S4. Rate constant distributions for all four modes of execution.** Parameters with asterisks (\*) are included in Figure 3C of the main text. Parameter indices (PN) match reaction indices (RN) in Figure 1 and Table 2 of the main text.

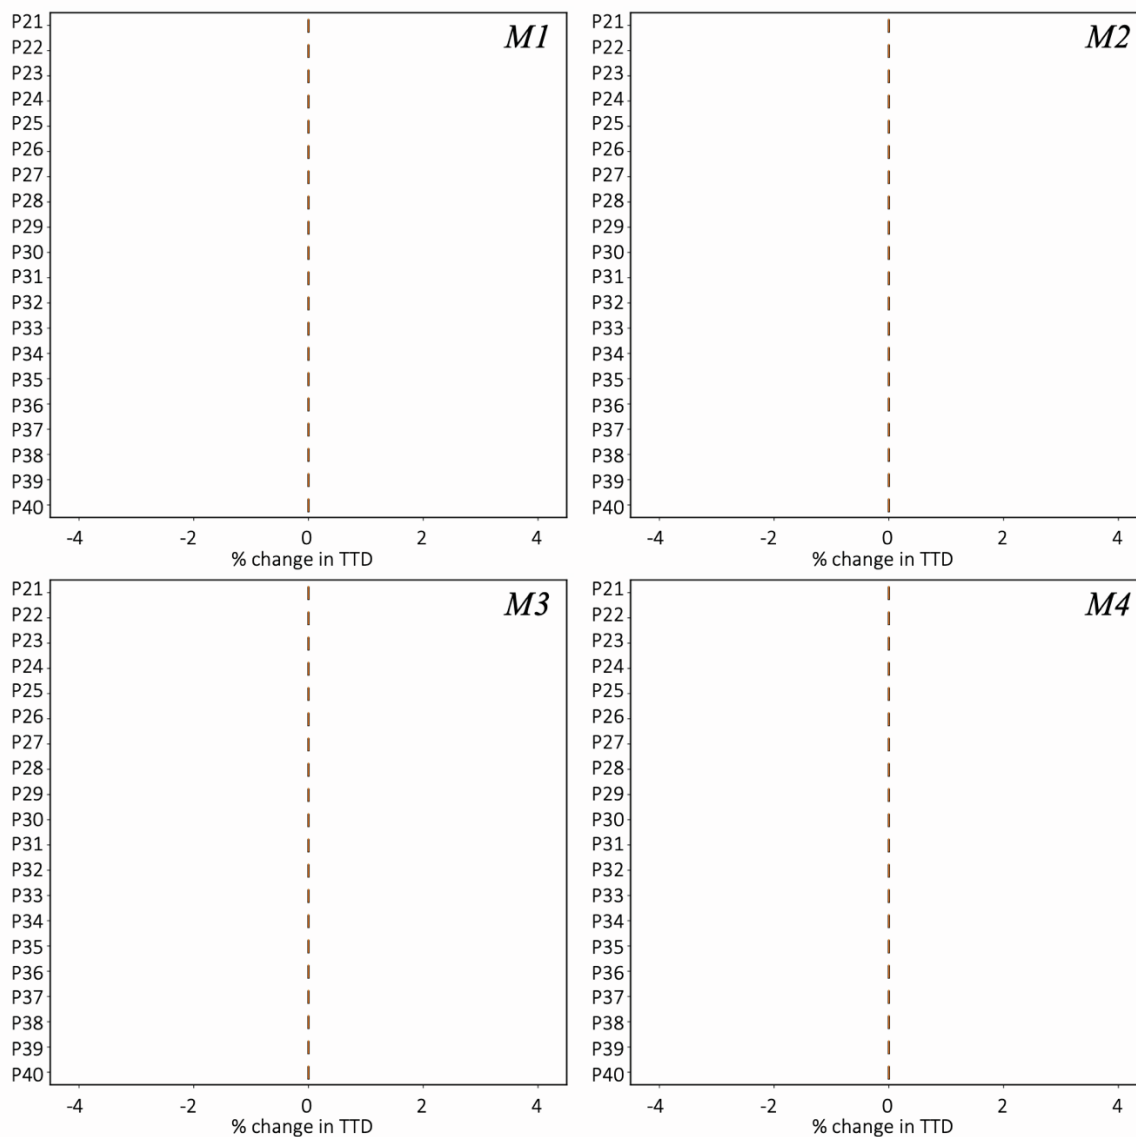

**Figure S5. Rate constant sensitivity analyses show no sensitivity to rate constants P21-P40 in any mode.** Values were varied in a range  $\pm 20\%$  around the reference parameter set for each mode. Parameter indices (PN) match reaction indices (RN) in Figure 1 and Table 2 of the main text.

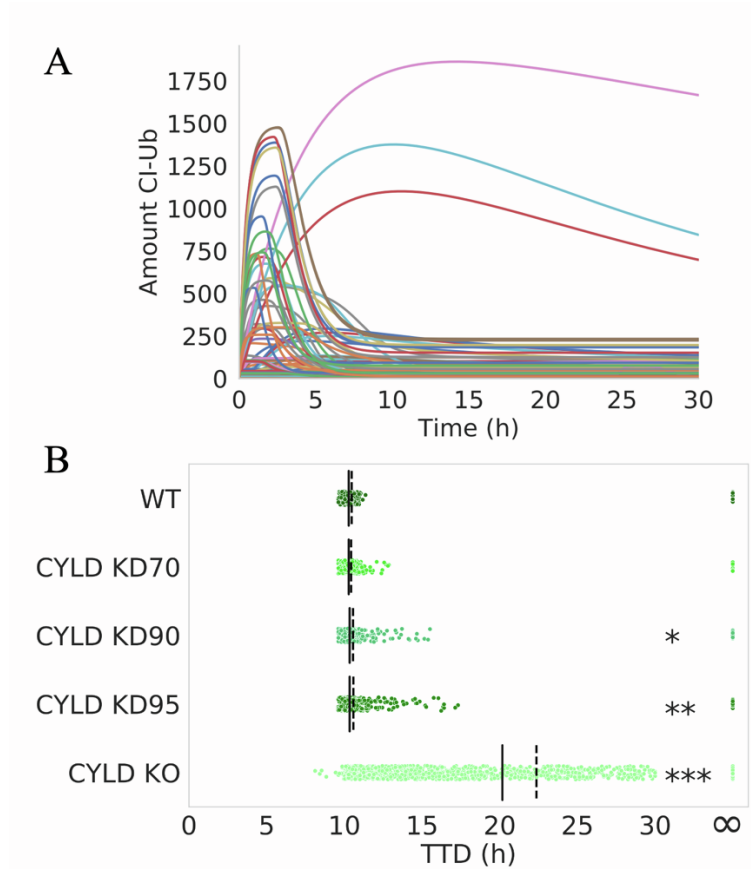

**Figure S6. Dynamics in necroptosis execution mode 4.** (A) Time courses for ubiquitinated complex I (CI-Ub) for all parameter sets in mode 4 show that CYLD (8,868 molecules; Table 1 of the main text) is always in great excess. (B) TTD distributions over all parameter sets in mode 4 for CYLD knockdowns (KDs; 70%-95%) and knock out (KO), compared to wild-type (WT). Solid black lines = medians, dashed black lines = means; \*  $p < 0.05$ , \*\*  $p < 0.01$ , \*\*\*  $p < 0.001$  (Mood's median test).

**Table S1. List of molecular species in the necroptosis model.** C8i, C8a: inactive and active caspase-8; MLKL-u, MLKL-p: unphosphorylated and phosphorylated MLKL; RIP1-u, RIP1-Ub, RIP1-p, RIP1-trunc: unmodified, ubiquitinated, phosphorylated, and truncated (degraded) RIP1; RIP3-u, RIP3-p: unphosphorylated and phosphorylated RIP3. Percent sign (%) signifies that proteins are within the same complex (not necessarily bound to each other).

| Variable | Species                                                   |
|----------|-----------------------------------------------------------|
| $x_0$    | TNF                                                       |
| $x_1$    | TNFR                                                      |
| $x_2$    | TRADD                                                     |
| $x_3$    | RIP1-u                                                    |
| $x_4$    | TRAF                                                      |
| $x_5$    | cIAP                                                      |
| $x_6$    | MLKL-u                                                    |
| $x_7$    | A20                                                       |
| $x_8$    | CYLD                                                      |
| $x_9$    | FADD                                                      |
| $x_{10}$ | RIP3-u                                                    |
| $x_{11}$ | FLIP                                                      |
| $x_{12}$ | LUBAC                                                     |
| $x_{13}$ | C8i                                                       |
| $x_{14}$ | TNF % TNFR                                                |
| $x_{15}$ | TNF % TNFR % TRADD                                        |
| $x_{16}$ | RIP1-u % TNF % TNFR % TRADD                               |
| $x_{17}$ | RIP1-u % TNF % TNFR % TRADD % TRAF                        |
| $x_{18}$ | RIP1-u % TNF % TNFR % TRADD % TRAF % cIAP                 |
| $x_{19}$ | RIP1-Ub % TNF % TNFR % TRADD % TRAF % cIAP                |
| $x_{20}$ | LUBAC % RIP1-Ub % TNF % TNFR % TRADD % TRAF % cIAP        |
| $x_{21}$ | A20 % LUBAC % RIP1-Ub % TNF % TNFR % TRADD % TRAF % cIAP  |
| $x_{22}$ | CYLD % LUBAC % RIP1-Ub % TNF % TNFR % TRADD % TRAF % cIAP |
| $x_{23}$ | RIP1-u % TRADD                                            |
| $x_{24}$ | FADD % RIP1-u % TRADD                                     |
| $x_{25}$ | C8i % FADD % RIP1-u % TRADD                               |
| $x_{26}$ | FADD % RIP1-u % RIP3-u % TRADD                            |
| $x_{27}$ | C8i % FADD % FLIP % RIP1-u % TRADD                        |
| $x_{28}$ | RIP1-u % RIP3-u                                           |
| $x_{29}$ | C8a % FADD % FLIP % RIP1-u % TRADD                        |
| $x_{30}$ | RIP1-u % RIP3-p                                           |
| $x_{31}$ | RIP1-trunc                                                |
| $x_{32}$ | C8a % FLIP                                                |
| $x_{33}$ | RIP1-p % RIP3-p                                           |
| $x_{34}$ | C8a % FADD % FLIP % RIP1-u % RIP3-u % TRADD               |
| $x_{35}$ | MLKL-u % RIP1-p % RIP3-p                                  |
| $x_{36}$ | MLKL-p                                                    |



**Table S2. Set of coupled differential equations for the necroptosis model.** Species corresponding to each variable,  $x_i$ , are given in Table S1. Square brackets indicate concentration. Median values of the rate constants ( $p_i$ ) for each mode are given in Table 2 of the main text.

|                                                                                                                                            |
|--------------------------------------------------------------------------------------------------------------------------------------------|
| $d[x_0]/dt = p_{19}[x_{21}] + p_2[x_{14}] + p_{20}[x_{22}] - p_3[x_0] - p_1[x_0][x_1]$                                                     |
| $d[x_1]/dt = p_{19}[x_{21}] + p_2[x_{14}] + p_{20}[x_{22}] - p_1[x_0][x_1]$                                                                |
| $d[x_2]/dt = p_{29}[x_{29}] + p_{34}[x_{34}] + p_{35}[x_{26}] + p_5[x_{15}] - p_4[x_{14}x_2]$                                              |
| $d[x_3]/dt = p_7[x_{16}] - p_6[x_{15}][x_3]$                                                                                               |
| $d[x_4]/dt = p_{19}[x_{21}] + p_{20}[x_{22}] + p_9[x_{17}] - p_8[x_{16}][x_4]$                                                             |
| $d[x_5]/dt = p_{11}[x_{18}] + p_{19}[x_{21}] + p_{20}[x_{22}] - p_{10}[x_{17}][x_5]$                                                       |
| $d[x_6]/dt = p_{39}[x_{35}] - p_{38}[x_{33}][x_6]$                                                                                         |
| $d[x_7]/dt = p_{16}[x_{21}] + p_{19}[x_{21}] - p_{15}[x_{20}][x_7]$                                                                        |
| $d[x_8]/dt = p_{18}[x_{22}] + p_{20}[x_{22}] - p_{17}[x_{20}][x_8]$                                                                        |
| $d[x_9]/dt = p_{22}[x_{24}] + p_{29}[x_{29}] + p_{34}[x_{34}] + p_{35}[x_{26}] - p_{21}[x_{23}][x_9]$                                      |
| $d[x_{10}]/dt = p_{31}[x_{26}] + p_{34}[x_{34}] - p_{30}[x_{10}][x_{24}]$                                                                  |
| $d[x_{11}]/dt = p_{26}[x_{27}] - p_{25}[x_{11}][x_{25}]$                                                                                   |
| $d[x_{12}]/dt = p_{14}[x_{20}] + p_{19}[x_{21}] + p_{20}[x_{22}] - p_{13}[x_{12}][x_{19}]$                                                 |
| $d[x_{13}]/dt = p_{24}[x_{25}] - p_{23}[x_{13}][x_{24}]$                                                                                   |
| $d[x_{14}]/dt = -p_2[x_{14}] + p_5[x_{15}] + p_1[x_0][x_1] - p_4[x_{14}][x_2]$                                                             |
| $d[x_{15}]/dt = -p_5[x_{15}] + p_7[x_{16}] + p_4[x_{14}][x_2] - p_6[x_{15}][x_3]$                                                          |
| $d[x_{16}]/dt = -p_7[x_{16}] + p_9[x_{17}] + p_6[x_{15}][x_3] - p_8[x_{16}][x_4]$                                                          |
| $d[x_{17}]/dt = p_{11}[x_{18}] - p_9[x_{17}] - p_{10}[x_{17}][x_5] + p_8[x_{16}][x_4]$                                                     |
| $d[x_{18}]/dt = -p_{11}[x_{18}] - p_{12}[x_{18}] + p_{10}[x_{17}][x_5]$                                                                    |
| $d[x_{19}]/dt = p_{12}[x_{18}] + p_{14}[x_{20}] - p_{13}[x_{12}][x_{19}]$                                                                  |
| $d[x_{20}]/dt = -p_{14}[x_{20}] + p_{16}[x_{21}] + p_{18}[x_{22}] + p_{13}[x_{12}][x_{19}] - p_{15}[x_{20}][x_7] - p_{17}[x_{20}][x_8]$    |
| $d[x_{21}]/dt = -p_{16}[x_{21}] - p_{19}[x_{21}] + p_{15}[x_{20}][x_7]$                                                                    |
| $d[x_{22}]/dt = -p_{18}[x_{22}] - p_{20}[x_{22}] + p_{17}[x_{20}][x_8]$                                                                    |
| $d[x_{23}]/dt = p_{19}[x_{21}] + p_{20}[x_{22}] + p_{22}[x_{24}] - p_{21}[x_{23}][x_9]$                                                    |
| $d[x_{24}]/dt = -p_{22}[x_{24}] + p_{24}[x_{25}] + p_{31}[x_{26}] + p_{21}[x_{23}][x_9] - p_{23}[x_{13}][x_{24}] - p_{30}[x_{10}][x_{24}]$ |
| $d[x_{25}]/dt = -p_{24}[x_{25}] + p_{26}[x_{27}] + p_{23}[x_{13}][x_{24}] - p_{25}[x_{11}][x_{25}]$                                        |
| $d[x_{26}]/dt = -p_{31}[x_{26}] + p_{33}[x_{34}] - p_{35}[x_{26}] + p_{30}[x_{10}][x_{24}] - p_{32}[x_{26}][x_{32}]$                       |
| $d[x_{27}]/dt = -p_{26}[x_{27}] - p_{27}[x_{27}] + p_{28}[x_{29}] + p_{25}[x_{11}][x_{25}]$                                                |
| $d[x_{28}]/dt = p_{35}[x_{26}] + p_{36}[x_{28}]$                                                                                           |
| $d[x_{29}]/dt = p_{27}[x_{27}] - p_{28}[x_{29}] - p_{29}[x_{29}]$                                                                          |
| $d[x_{30}]/dt = p_{36}[x_{28}] - p_{37}[x_{30}]$                                                                                           |
| $d[x_{31}]/dt = p_{29}[x_{29}] + p_{34}[x_{34}]$                                                                                           |
| $d[x_{32}]/dt = p_{29}[x_{29}] + p_{33}[x_{34}] + p_{34}[x_{34}] - p_{32}[x_{26}][x_{32}]$                                                 |
| $d[x_{33}]/dt = p_{37}[x_{30}] + p_{39}[x_{35}] + p_{40}[x_{35}] - p_{38}[x_{33}][x_6]$                                                    |
| $d[x_{34}]/dt = -p_{33}[x_{34}] - p_{34}[x_{34}] + p_{32}[x_{26}][x_{32}]$                                                                 |
| $d[x_{35}]/dt = -p_{39}[x_{35}] - p_{40}[x_{35}] + p_{38}[x_{33}][x_6]$                                                                    |
| $d[x_{36}]/dt = p_{40}[x_{35}]$                                                                                                            |
